# Supplementary material for: Altered Expression of Polycomb Group Genes in Glioblastoma Multiforme
Source: PubMed Central journal article supplement (PMC3829908; doi:10.1371/journal.pone.0080970), 2013-11-15
Supplement: pone.0080970.s003.pdf [file pone.0080970.s003.pdf]

**A**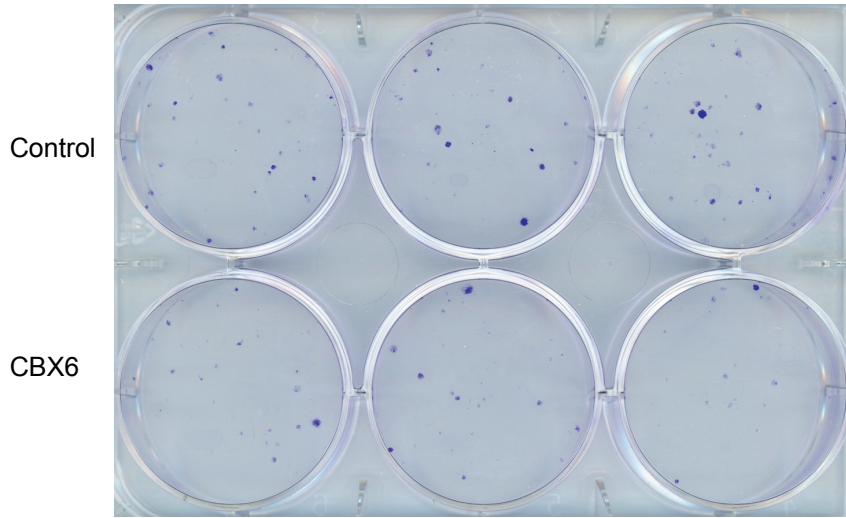**B**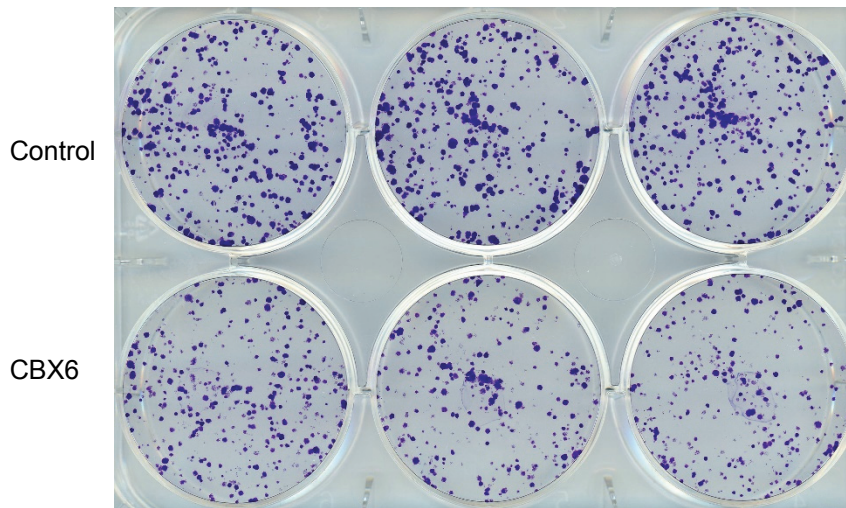**C**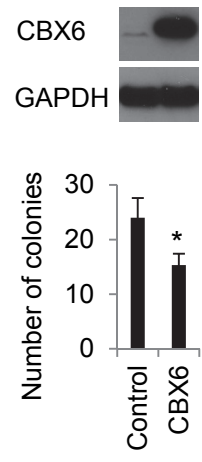**D**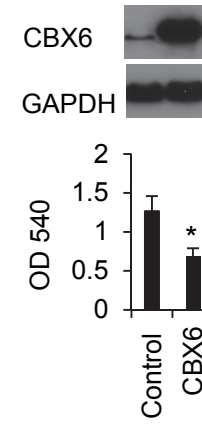

Li et al. Figure S3
